# Supplementary material for: Analysis of QTLs Associated with the Rice Quality Related Gene by Double Haploid Populations
Source: Hindawi journal article supplement (doi:10.1155/2014/781832), 2014-01-01
Supplement: f1 [file 781832.f1.pdf]

## **Appendix A. Supplementary data**

### **Analysis of QTLs associated with the rice quality related gene by double haploid populations**

**Gyu-Ho Lee, Byung-Wook Yun, Kyung-Min Kim\***

Division of Plant Biosciences, School of Applied Biosciences, College of Agriculture & Life Science, Kyungpook National University, Daegu 702-701, South Korea

\*Corresponding author: Kyung-Min Kim, E-mail: kkm@knu.ac.kr, Tel: +82-53-950-5711, Fax: +82-53-958-6880

Gyu-Ho Lee, bllizard@knu.ac.kr ; Byung-Wook Yun, bwyun@knu.ac.kr

**Supplementary Table 1**

Analysis of the general growth characteristics between parents and the double hybridization (DH) population.

| Item         | Plant height (cm)       | Panicle length (cm) | Spikelets per panicle (no.) | Weight of 1,000 grains (g) | Yield (kg/10 a) |
|--------------|-------------------------|---------------------|-----------------------------|----------------------------|-----------------|
| Cheongcheong | 78.1 ± 3.4 <sup>a</sup> | 22.2 ± 1.0          | 14.6 ± 1.6                  | 24.6                       | 611.2           |
| Nagdong      | 72.1 ± 7.7              | 19.1 ± 1.0          | 13.9 ± 2.3                  | 24.2                       | 650.6           |
| CNDH         | 76.5 ± 19.1             | 20.6 ± 2.8          | 14.5 ± 3.1                  | 23.4                       | 498.4           |

<sup>a</sup>The data are presented as mean ± standard deviation

## Supplementary Table 2

The 20 lines having high level of amylose content.

| Sample <sup>a</sup>  | Parents        |                | CNDH lines with high amylose content |       |       |       |       |       |       |       |       |       |       |       |       |       |       |       |       |       |       |       | Index of coincidence (%) |
|----------------------|----------------|----------------|--------------------------------------|-------|-------|-------|-------|-------|-------|-------|-------|-------|-------|-------|-------|-------|-------|-------|-------|-------|-------|-------|--------------------------|
|                      | C              | N              | 49                                   | 50    | 51    | 65    | 39    | 57    | 67    | 5     | 20    | 19    | 2     | 36    | 55    | 64    | 15    | 27    | 1     | 59    | 56    | 46    |                          |
| Content <sup>b</sup> | 15.30          | 18.37          | 25.36                                | 24.63 | 23.89 | 22.42 | 21.31 | 21.17 | 19.28 | 18.96 | 18.83 | 18.50 | 18.45 | 18.32 | 18.10 | 18.05 | 17.88 | 17.84 | 17.82 | 17.65 | 17.61 | 17.51 |                          |
| RM21105 <sup>c</sup> | O <sup>d</sup> | X <sup>e</sup> | O                                    | O     | O     | X     | X     | X     | O     | O     | O     | O     | X     | O     | O     | O     | X     | O     | X     | O     | O     | O     | 70%                      |

<sup>a</sup>The parents ‘Cheongcheong’ and ‘Nagdong’ and 20 lines of CNDH population with high amylose content are used, <sup>b</sup> Amylose content is measured by using NIRS, <sup>c</sup> RM21105 on chromosome 7 is used for PCR, <sup>d, e</sup> The genotypes mean as genotype of Cheongcheong and Nagdong.

### Supplementary Table 3

The 20 lines having low level of amylose content.

| Sample <sup>a</sup>  | Parents        |                | CNDH lines with low amylose content |       |       |       |       |       |       |       |       |       |       |       |       |       |       |       |       |       |       | Index of coincidence (%) |     |
|----------------------|----------------|----------------|-------------------------------------|-------|-------|-------|-------|-------|-------|-------|-------|-------|-------|-------|-------|-------|-------|-------|-------|-------|-------|--------------------------|-----|
|                      | C              | N              | 8                                   | 16    | 31    | 24    | 58    | 11    | 12    | 52    | 10    | 53    | 3     | 13    | 34    | 26    | 47    | 48    | 4     | 61    | 25    |                          | 9   |
| Content <sup>b</sup> | 15.30          | 18.37          | 12.41                               | 12.44 | 13.14 | 13.57 | 13.60 | 13.66 | 13.66 | 13.74 | 13.91 | 14.16 | 14.21 | 14.27 | 14.27 | 14.30 | 14.40 | 14.54 | 14.68 | 14.72 | 15.07 | 15.16                    |     |
| RM26771 <sup>c</sup> | O <sup>d</sup> | X <sup>e</sup> | O                                   | O     | O     | O     | X     | O     | O     | O     | O     | O     | O     | X     | O     | O     | X     | O     | O     | O     | X     | O                        | 80% |
| RM3482               | O              | X              | X                                   | O     | O     | O     | O     | O     | O     | O     | O     | O     | X     | X     | O     | O     | -     | O     | O     | O     | O     | O                        | 75% |
| RM26801              | O              | X              | O                                   | O     | O     | O     | X     | O     | X     | X     | O     | O     | O     | O     | O     | X     | O     | X     | O     | O     | X     | O                        | 70% |

<sup>a</sup>The parents ‘Cheongcheong’ and ‘Nagdong’ and 20 lines of CNDH population with high amylose content are selected, <sup>b</sup> Amylose content is measured by using NIRS, <sup>c</sup> The markers on chromosome 11 are used for PCR, <sup>d, e</sup> The genotypes mean as genotype of Cheongcheong and Nagdong.

### Supplementary Table 4

The 20 lines having low level of protein content.

| Chr. | Sample <sup>a</sup>  | CNDH lines with low protein content |                |       |       |       |       |       |       |       |       |       |       |       |       |       |       |       |       |       |       | Index of coincidence (%) |       |     |
|------|----------------------|-------------------------------------|----------------|-------|-------|-------|-------|-------|-------|-------|-------|-------|-------|-------|-------|-------|-------|-------|-------|-------|-------|--------------------------|-------|-----|
|      |                      | C                                   | N              | 60    | 19    | 44    | 2     | 55    | 14    | 59    | 1     | 37    | 54    | 67    | 61    | 56    | 62    | 36    | 5     | 41    | 68    |                          | 5     | 64  |
|      | Content <sup>b</sup> | 7.656                               | 6.381          | 6.279 | 6.362 | 6.365 | 6.371 | 6.488 | 6.611 | 6.622 | 6.638 | 6.758 | 6.798 | 6.853 | 6.880 | 6.914 | 6.973 | 6.981 | 7.401 | 7.552 | 7.631 | 7.644                    | 7.652 |     |
| 2    | RM12532 <sup>c</sup> | O <sup>d</sup>                      | X <sup>e</sup> | X     | O     | X     | O     | X     | X     | X     | X     | O     | X     | X     | X     | X     | X     | X     | X     | X     | X     | X                        | X     | 70% |
|      | RM555                | O                                   | X              | X     | O     | X     | O     | X     | O     | X     | X     | O     | X     | X     | X     | X     | X     | X     | X     | X     | X     | O                        | X     | 70% |
| 8    | RM506                | O                                   | X              | O     | O     | O     | X     | X     | X     | X     | X     | X     | O     | X     | O     | X     | X     | X     | X     | X     | X     | X                        | X     | 75% |
|      | RM22198              | O                                   | X              | O     | O     | O     | X     | X     | X     | X     | X     | X     | O     | X     | O     | X     | X     | X     | X     | X     | X     | X                        | X     | 75% |
|      | RM22334              | O                                   | X              | O     | O     | O     | X     | X     | X     | X     | X     | X     | O     | X     | O     | X     | X     | X     | X     | X     | X     | X                        | O     | 70% |

<sup>a</sup>The parents ‘Cheongcheong’ and ‘Nagdong’ and 20 lines of CNDH population with high amylose content are selected, <sup>b</sup> Amylose content is measured by using NIRS, <sup>c</sup> The SSR markers on chromosome 2 are used for PCR, <sup>d, e</sup> The genotypes mean as genotype of Cheongcheong and Nagdong.

### Supplementary Table 5

The 20 lines having low level of lipid content.

| Sample <sup>a</sup>  | Parents        |                | CNDH lines with low protein content |       |       |       |       |       |       |       |       |       |       |       |       |       |       |       |       |       |       |       | Index of coincidence (%) |
|----------------------|----------------|----------------|-------------------------------------|-------|-------|-------|-------|-------|-------|-------|-------|-------|-------|-------|-------|-------|-------|-------|-------|-------|-------|-------|--------------------------|
|                      | C              | N              | 18                                  | 55    | 49    | 67    | 56    | 63    | 43    | 44    | 54    | 40    | 60    | 66    | 27    | 50    | 45    | 61    | 68    | 39    | 51    | 47    |                          |
| Content <sup>b</sup> | 3.414          | 2.934          | 2.178                               | 2.496 | 2.531 | 2.578 | 2.619 | 2.620 | 2.671 | 2.672 | 2.675 | 2.724 | 2.731 | 2.776 | 2.806 | 2.822 | 2.849 | 2.861 | 2.930 | 3.002 | 3.066 | 3.078 |                          |
| RM15063 <sup>c</sup> | O <sup>d</sup> | X <sup>e</sup> | O                                   | O     | O     | X     | O     | O     | O     | O     | O     | X     | O     | O     | O     | X     | X     | O     | X     | X     | O     | O     | 70%                      |
| RM15448              | O              | X              | O                                   | O     | O     | O     | O     | O     | O     | O     | O     | X     | O     | O     | O     | O     | X     | O     | X     | X     | X     | X     | 70%                      |

<sup>a</sup>The parents ‘Cheongcheong’ and ‘Nagdong’ and 20 lines of CNDH population with high amylose content are selected, <sup>b</sup>Amylose content is measured by using NIRS, <sup>c</sup>The SSR markers on chromosome 3 are used for PCR, <sup>d</sup>,<sup>e</sup>The genotypes mean as genotype of Cheongcheong and Nagdong.
